# Supplementary material for: Verification of exposure to chemical warfare agents through analysis of persistent biomarkers in plants
Source: Royal Society of Chemistry journal article supplement (doi:10.1039/d2ay01650h), 2022-12-16
Supplement: d2ay01650h1.pdf [file d2ay01650h1.pdf]

# Verification of exposure to chemical warfare agents through analysis of persistent biomarkers in plants

Mirjam de Bruin-Hoegée<sup>a,b,\*</sup>, Latifa Lamriti<sup>a,b</sup>, Jan Langenberg<sup>b</sup>, René C. M. Olivier<sup>b</sup>, Lai Fun Chau<sup>b</sup>, Marcel van der Schans<sup>b</sup>, Daan Noort<sup>b</sup>, Arian C. van Asten<sup>a,c</sup>

<sup>a</sup>van 't Hoff Institute for Molecular Sciences, Faculty of Science, University of Amsterdam, P.O. Box 94157, 1090GD Amsterdam, The Netherlands

<sup>b</sup>TNO Defence, Safety and Security, Dep. CBRN Protection, Lange Kleiweg 137, 2288GJ Rijswijk, The Netherlands

<sup>c</sup>CLHC, Amsterdam Center for Forensic Science and Medicine, University of Amsterdam, P.O. Box 94157, 1090GD Amsterdam, The Netherlands

\*Corresponding author. *Email address:* [mirjam.debruin@tno.nl](mailto:mirjam.debruin@tno.nl) (M. de Bruin-Hoegée)

## Contents

- Section A.1. Method optimization and validation
  - Figure A.1. Calibration curves
- Section A.2. Visual examination of vegetation
  - Figure A.2. Physical state of nettle leaf upon liquid exposure to A-234
  - Figure A.3. Physical state of plants upon vapor exposure to 25 mg/m<sup>3</sup> of sarin
  - Figure A.4. Physical state of nettle upon vapor exposure to 250 mg/m<sup>3</sup> of sarin
- Section A.3. Chromatograms after three months
  - Figure A.5. Extracted ion chromatograms of phosphorylated tyrosine adduct
  - Figure A.6. Extracted ion chromatograms of chlorinated tyrosine adducts
  - Figure A.7. Extracted ion chromatograms of N1-HETE-His and N3-HETE-His adducts
- Table A.1. Identified biomarkers in plants after chlorine, sarin or sulfur mustard exposure

### A.1. Method optimization and validation

The gradient elution was optimized for each analyte (Table A.1). The chemicals could be analyzed with a single chromatographic method as well, which is the same as described for the A-234 and GB adducts.

Table A. 1. Gradient elution settings for LC-MS/MS analyses. Eluent A is water with 0.2% v/v formic acid and eluent B is ACN with 0.2% v/v formic acid.

| Analyte                                                     | Eluent A (%)     | Linear ramping (min) | Eluent A (%)    | Eluent A (%)     |
|-------------------------------------------------------------|------------------|----------------------|-----------------|------------------|
| A-234-Tyr<br>GB-Tyr<br>MPA-Tyr                              | 100 (hold 1 min) | 10                   | 50 (hold 2 min) | 100 (hold 3 min) |
| Cl-Tyr<br>di-Cl-Tyr<br><sup>13</sup> C <sub>6</sub> -Cl-Tyr | 100 (hold 2 min) | 8                    | 20 (hold 2 min) | 100 (hold 3 min) |
| N1-HETE-His<br>N3-HETE-His                                  | 100 (hold 3 min) | 3                    | 20 (hold 1 min) | 100 (hold 3 min) |

For GB-Tyr, linear calibration curves were obtained in the range of 0.05 – 20 ng/mL with  $R^2 = 0.9997 - 0.99999$  (Figure A.1A). The mean values for the quality controls were within 2.6% relative standard deviation at 0.1, 1 and 10 ng/mL (n=10 for each concentration). The stability of the analyte was assessed over two weeks and the concentration was within 15% of the nominal value for 0.1 ng/mL and within 3.3% for 1 and 10 ng/mL.

In addition, linear calibration curves were obtained in the range of 1 – 100 ng/mL with  $R^2 = 0.9999 - 0.99995$  for Cl-Tyr and di-Cl-Tyr as well (Figure A.1B). The mean values for the quality controls were within 20% at 1 ng/mL and within 6% relative standard deviation at both 10 ng/mL and 100 ng/mL (n = 10, for each concentration). The stability of the analytes was assessed over two weeks and the concentration was within 18% of the nominal value for 1 ng/mL and within 3.8% for 10 and 100 ng/mL.

Third, the LC-MS/MS method was validated for N1-HETE-HIS and N3-HETE-HIS. Linear calibration curves were obtained in the range of 1 – 50 ng/mL with  $R^2 = 0.9987 - 0.9997$  (Figure A.1C). The mean values of the quality controls were within 5% for 1 and 10 ng/mL N1-HETE-HIS and N3-HETE-HIS (n = 10, for each concentration). The stability of the analytes was assessed over one week and the concentration was within 23% for 1 ng/mL N3-HETE-HIS and within 6% for 1 ng/mL N1-HETE-HIS and 10 ng/mL N1-HETE-HIS and N3-HETE-HIS.

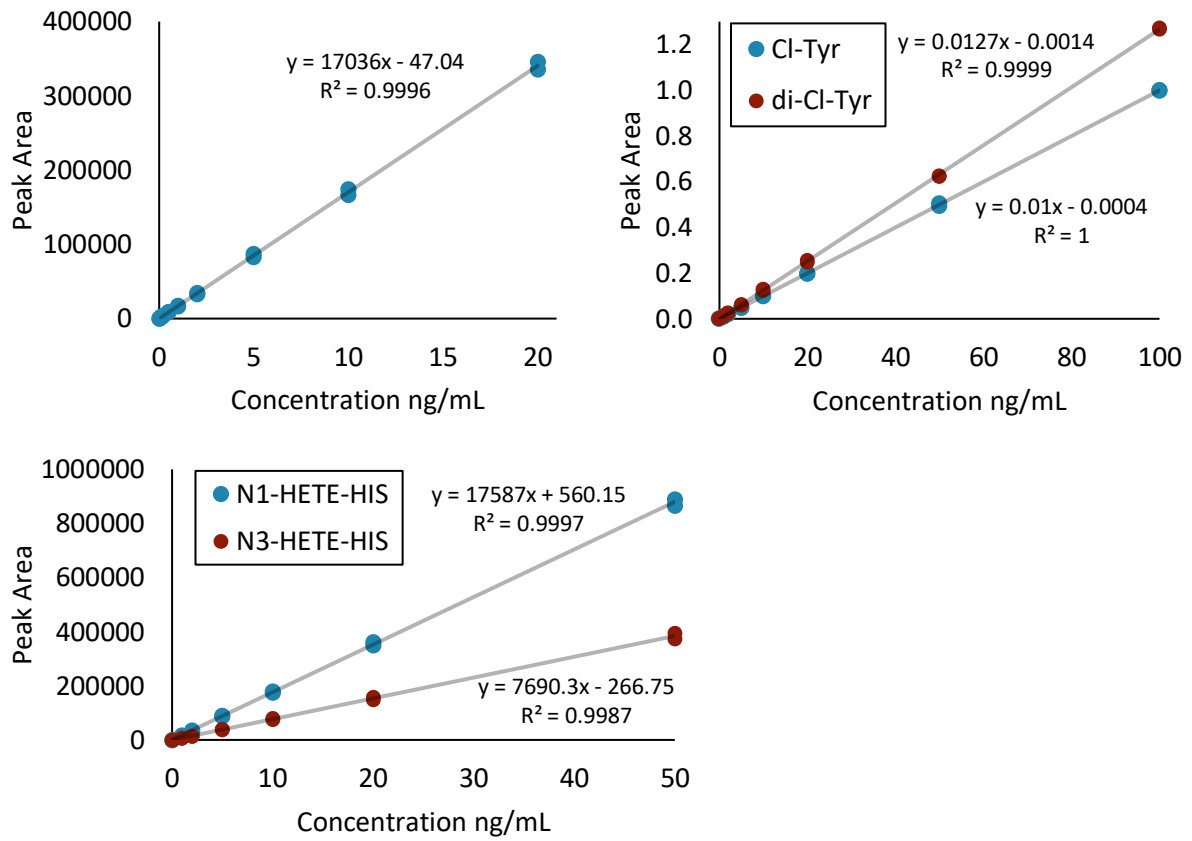

Figure A. 1. Calibration curves analyzed by LC-MS/MS of A) GB-Tyr, B) 3-chlorotyrosine (Cl-Tyr) and 3,5-dichlorotyrosine (di-Cl-Tyr) with internal standard 13C6-3-chloro-L-tyrosine, C) N1-HETE-HIS and N3-HETE-HIS adducts of sulfur mustard.

## A.2. Visual examination of vegetation

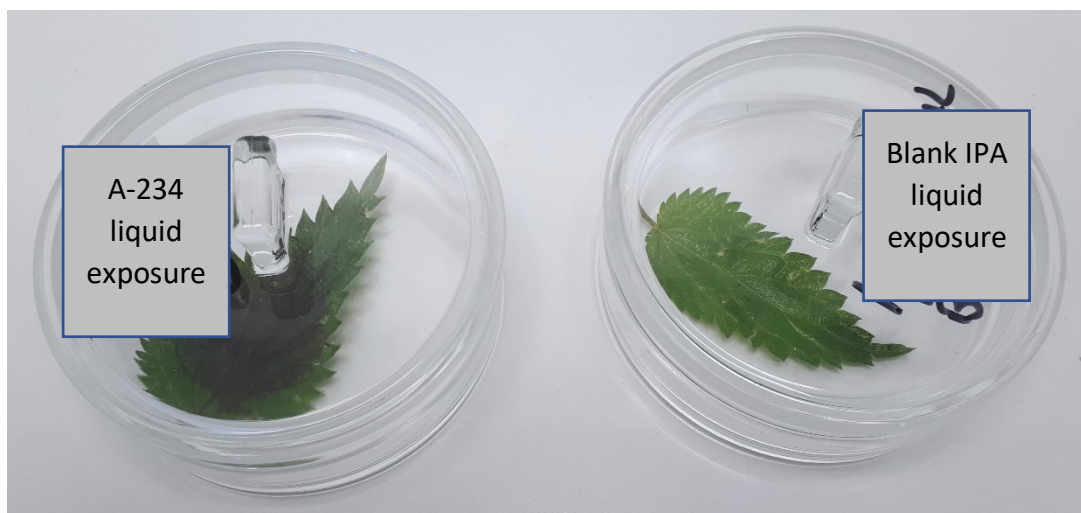

Figure A. 2. Physical state of nettle leaf upon liquid exposure to A-234.

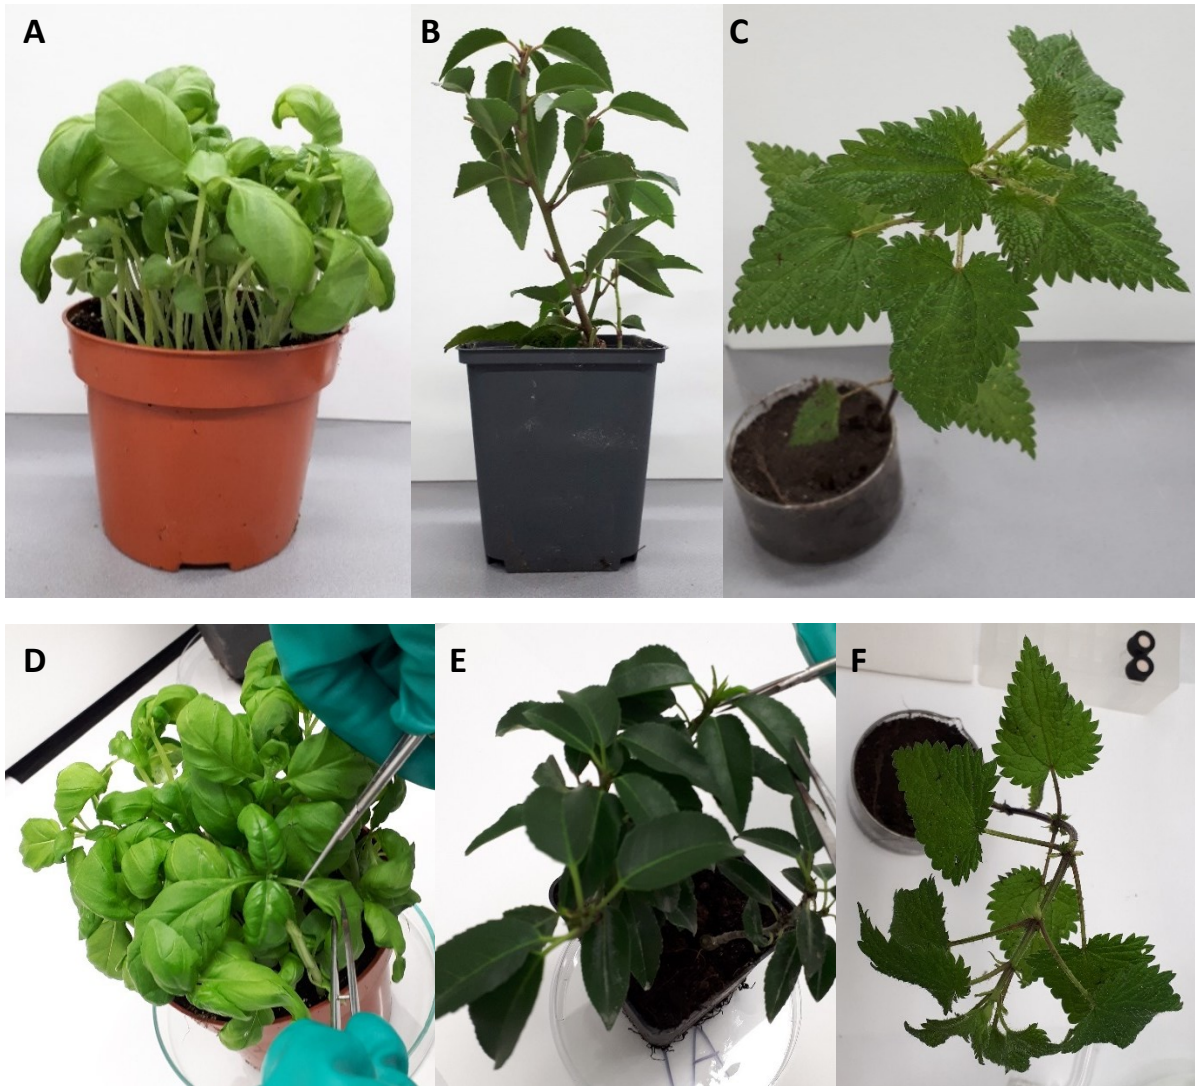

Figure A. 3. No notable differences were observed for A) Laurel, B) Basil and C) Nettle prior to exposure compared to D) Laurel, E) Basil and F) Nettle immediately after vapor exposure of 25 mg/m<sup>3</sup> sarin in the vapor generation set-up.

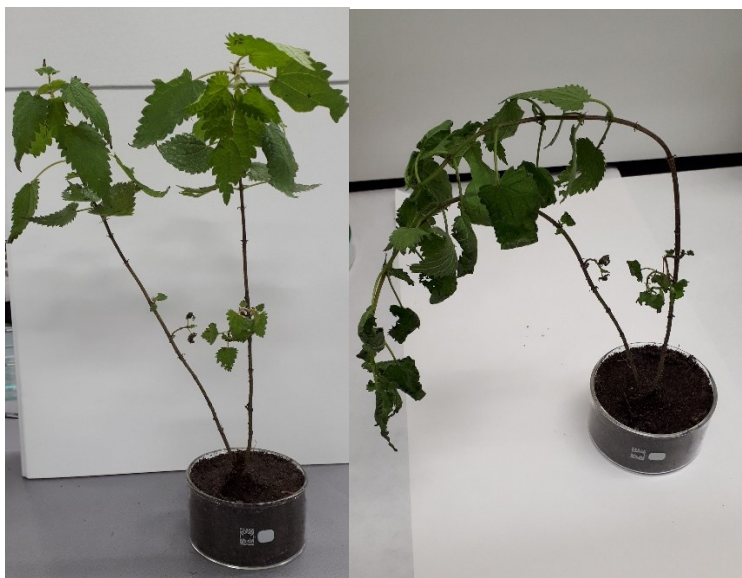

Figure A. 4. Nettle A) prior to exposure B) after 250 mg/m<sup>3</sup> exposure to sarin. It should be noted that the change could also be due to the dry atmosphere in the vapor generation set-up instead as a result of the chemical warfare agent exposure.

### A.3. Chromatograms after three months

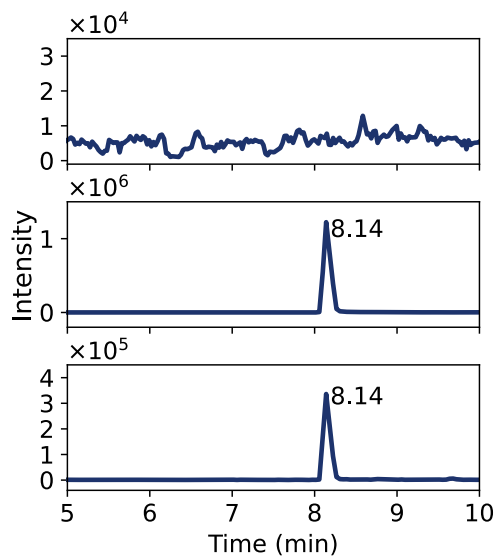

Figure A. 5. Extracted ion chromatograms of phosphylated tyrosine adduct with  $t_R = 8.14$  three months after sarin vapor exposure. A) Sample preparation blank. B) Standard GB-Tyr. C) GB-Tyr measured after plant exposure to 250 mg/m<sup>3</sup> sarin.

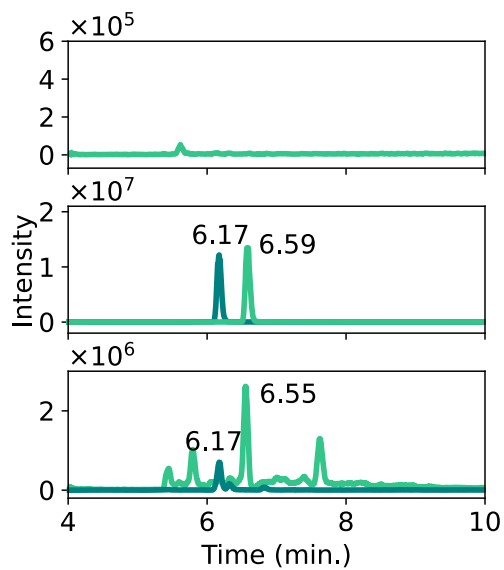

Figure A. 6. Extracted ion chromatograms of chlorinated tyrosine adducts three months after chlorine gas exposure. A) Sample preparation blank. B) Standard Cl-Tyr with  $t_R = 6.17$  min and di-Cl-Tyr with  $t_R = 6.59$  min. C) Cl-Tyr and di-Cl-Tyr after 5 g/m<sup>3</sup> plant exposure.

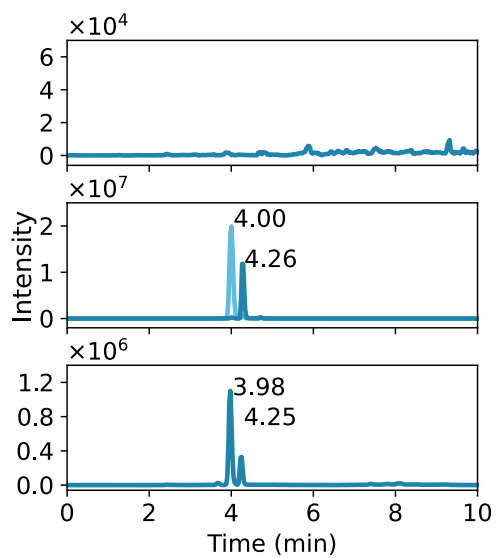

Figure A. 7. Extracted ion chromatograms of N1-HETE-His and N3-HETE-His adducts three months after sulfur mustard vapor exposure. A) Sample preparation blank. B) Standard N1-HETE-His with  $t_R = 4.00$  min and N3-HETE-His with  $t_R = 4.26$  min. C) N1-HETE-His and N3-HETE-His measured after  $150 \text{ mg/m}^3$  plant exposure.

Table A. 2. Identified biomarkers in plants after chlorine, sarin or sulfur mustard exposure.

| Peptide                                     | Accession           | Protein                                           | Mass (Da) | t <sub>R</sub> (min) | Exposure | Species | N (#) <sup>a</sup> |
|---------------------------------------------|---------------------|---------------------------------------------------|-----------|----------------------|----------|---------|--------------------|
| Y(+120.03)FRLSSLEKCY(+120.03)SR             | P93211 14336_SOLLC  | 14-3-3 protein                                    | 1890.9    | 16.4                 | GB       | Basil   | 1                  |
| KSCSY(+33.96)ELETELSK                       | P29307 1433_OENEH   | 14-3-3 protein                                    | 1549.7    | 16.0                 | Cl       | Nettle  | 1                  |
| H(+105.04)DKHELQEAAHNK                      | P93784 14335_SOLTU  | 14-3-3 protein                                    | 1660.8    | 20.1                 | HD       | Laurel  | 1                  |
| AEEAAEKY(+120.03)RKPAAAEATAAPPR             | P49608 ACOC_CUCMA   | Aconitate hydratase, cytoplasmic                  | 2417.2    | 16.1                 | GB       | Basil   | 1                  |
| CY(+120.03)KLLLPPTLVVADKFAFAEHK             | O65396 GCST_ARATH   | Aminomethyltransferase, mitochondrial             | 2626.4    | 21.2                 | GB       | Laurel  | 1                  |
| GYPGY(+33.96)LYTDLATIYER                    | B0K8E7 VATB_THEP3   | ATP synthase                                      | 1927.9    | 21.3                 | Cl       | Nettle  | 2                  |
| MY(+120.03)Y(+120.03)EAKETLELAEAVKR         | Q0ZJ14 ATPE_VITVI   | ATP synthase, chloroplasmic                       | 2283.1    | 21.6                 | GB       | Laurel  | 1                  |
| QMLPLCH(+105.04)CQTLLEAEAGGLR               | Q2MI94 ATPE_SOLLC   | ATP synthase, chloroplasmic                       | 2287.1    | 21.6                 | HD       | Basil   | 1                  |
| EAQAVADDVFSLFISEEVDKVELLY(+33.96)TK         | Q01908 ATPG1_ARATH  | ATP synthase, chloroplasmic                       | 3091.5    | 22.8                 | Cl       | Nettle  | 2                  |
| WEHY(+120.03)FMESLASELAAR                   | P29790 ATPG_TOBAC   | ATP synthase, chloroplasmic                       | 2058.9    | 20.2                 | GB       | Laurel  | 1                  |
| KVEY(+120.03)MRVLMGDGLFLQEGSWK              | A6MM21 ATPA_BUXMI   | ATP synthase, chloroplasmic                       | 2605.3    | 22.0                 | GB       | Basil   | 1                  |
| NY(+120.03)MQVDPFQESGVLNEENLAESK            | Q68RZ9 ATPB_PANGI   | ATP synthase, chloroplasmic                       | 2760.2    | 18.8                 | GB       | Basil   | 1                  |
| Y(+120.03)FKLATSGSGVSTLEK                   | Q68RZ9 ATPB_PANGI   | ATP synthase, chloroplasmic                       | 1806.9    | 17.1                 | GB       | Basil   | 1                  |
| Y(+120.03)VGPVADPLDSTPNAVMPR                | Q68RZ9 ATPB_PANGI   | ATP synthase, chloroplasmic                       | 2118.0    | 20.8                 | GB       | Basil   | 1                  |
| RY(+120.03)PAVDPLDSFHVMPR                   | Q85V35 ATPB_LACPU   | ATP synthase, chloroplasmic                       | 2118.0    | 20.7                 | GB       | Basil   | 1                  |
| VGLTALTIAEY(+33.96)FR                       | O03081 ATPB_PSINU   | ATP synthase, chloroplasmic                       | 1486.8    | 21.2                 | Cl       | Nettle  | 2                  |
| VGLTALTIAEY(+67.92)FR                       | O03081 ATPB_PSINU   | ATP synthase, chloroplasmic                       | 1520.7    | 21.6                 | Cl       | Nettle  | 1                  |
| QVY(+120.03)HLNEQNLAESK                     | Q2L917 ATPB_GOSHI   | ATP synthase, chloroplasmic                       | 1791.9    | 16.6                 | GB       | Laurel  | 1                  |
| Y(+120.03)NMCY(+120.03)RWWRLNEKNLAESK       | Q2L917 ATPB_GOSHI   | ATP synthase, chloroplasmic                       | 2743.3    | 19.9                 | GB       | Laurel  | 1                  |
| Y(+120.03)Y(+120.03)Y(+120.03)VVLSTEMGTLKER | Q2L917 ATPB_GOSHI   | ATP synthase, chloroplasmic                       | 2311.1    | 20.1                 | GB       | Laurel  | 1                  |
| KYY(+120.03)NMY(+120.03)SPAGYLENK           | P19023 ATPB_M_MAIZE | ATP synthase, mitochondrial                       | 2079.9    | 19.8                 | GB       | Basil   | 1                  |
| Y(+120.03)DADSGGVVLYVK                      | Q41396 VATE_SPIOL   | ATPase                                            | 1504.7    | 18.5                 | GB       | Basil   | 1                  |
| AY(+120.03)ENGLTSLVAGR                      | O80860 FTSH2_ARATH  | ATP-dependent zinc metalloprotease, chloroplasmic | 1356.6    | 23.1                 | GB       | Basil   | 1                  |
| EALGKAEKALASLEH(+105.04)KEETLK              | Q655S1 FTSH2_ORYSJ  | ATP-dependent zinc metalloprotease, chloroplasmic | 2641.4    | 20.3                 | HD       | Basil   | 1                  |
| Y(+33.96)AGVGAAIEYAVLHLK                    | P42737 BCA2_ARATH   | Carbonic anhydrase, chloroplasmic                 | 1707.9    | 20.9                 | Cl       | Nettle  | 2                  |
| WY(+120.03)WY(+120.03)KLLSSVDLLEEKLR        | B9N843 ACCC2_POPTR  | Biotin carboxylase, chloroplasmic                 | 2580.3    | 21.0                 | GB       | Basil   | 1                  |
| H(+105.04)NLTDDQLSEFK                       | Q39752 CALM_FAGSY   | Calmodulin                                        | 1550.7    | 21.4                 | HD       | Laurel  | 2                  |
| GPILLEDY(+33.96)HLVEK                       | P48350 CATA1_CUCPE  | Catalase                                          | 1558.8    | 20.7                 | Cl       | Nettle  | 1                  |

|                                                   |                        |                                                            |        |      |    |        |   |
|---------------------------------------------------|------------------------|------------------------------------------------------------|--------|------|----|--------|---|
| LPACCAY(+120.03)RLLLEKENNK                        | P48350 CATA<br>1_CUCPE | Catalase                                                   | 1984.0 | 16.0 | GB | Laurel | 1 |
| Y(+120.03)FELEQENNKNVASSTGK                       | P48350 CATA<br>1_CUCPE | Catalase                                                   | 2177.0 | 15.9 | GB | Basil  | 1 |
| GPLENLADHLADPVNNNAWAY(+33.96)ATKL<br>CPGK         | P09755 CB22<br>_SOYBN  | Chlorophyll binding protein,<br>chloroplastic              | 3125.5 | 22.3 | Cl | Nettle | 2 |
| CY(+120.03)GDYLGPNLLVVPK                          | P09756 CB23<br>_SOYBN  | Chlorophyll binding protein,<br>chloroplastic              | 1883.9 | 20.5 | GB | Laurel | 1 |
| GY(+120.03)CDYLGPNPSLVVPAR                        | P09756 CB23<br>_SOYBN  | Chlorophyll binding protein,<br>chloroplastic              | 1842.9 | 20.2 | GB | Laurel | 1 |
| LVY(+120.03)FYLAPELLGK                            | P27522 CB13<br>_SOLLC  | Chlorophyll binding protein,<br>chloroplastic              | 1644.9 | 21.6 | GB | Basil  | 1 |
| DHVKPVSSGSY(+120.03)YGDPR                         | P04783 CB25<br>_PETSP  | Chlorophyll binding protein,<br>chloroplastic              | 1882.9 | 19.0 | GB | Basil  | 1 |
| Y(+120.03)Y(+120.03)PNATGDKGYPGGK                 | P36494 CB4_<br>SPIOL   | Chlorophyll binding protein,<br>chloroplastic              | 1826.8 | 17.8 | GB | Basil  | 1 |
| KLY(+120.03)RYLKFDLDSLQNLAK                       | Q07473 CB4A<br>_ARATH  | Chlorophyll binding protein,<br>chloroplastic              | 2462.3 | 22.3 | GB | Basil  | 1 |
| NY(+120.03)WELLHGR                                | Q07473 CB4A<br>_ARATH  | Chlorophyll binding protein,<br>chloroplastic              | 1306.6 | 17.8 | GB | Basil  | 1 |
| Y(+120.03)CMVQSTPFQDHRSQLVLR                      | Q07473 CB4A<br>_ARATH  | Chlorophyll binding protein,<br>chloroplastic              | 2526.2 | 21.8 | GB | Laurel | 1 |
| Y(+120.03)GELLHGR                                 | Q07473 CB4A<br>_ARATH  | Chlorophyll binding protein,<br>chloroplastic              | 1306.6 | 17.8 | GB | Basil  | 2 |
| Y(+120.03)YHELLHGR                                | Q07473 CB4A<br>_ARATH  | Chlorophyll binding protein,<br>chloroplastic              | 1306.6 | 18.0 | GB | Basil  | 1 |
| EFLVLH(+105.04)LQFELDSLQGLAK                      | Q9XF88 CB4B<br>_ARATH  | Chlorophyll binding protein,<br>chloroplastic              | 2476.3 | 22.3 | HD | Basil  | 2 |
| EVPLYH(+105.04)LQFDLDSLQNLAK                      | Q9XF88 CB4B<br>_ARATH  | Chlorophyll binding protein,<br>chloroplastic              | 2462.2 | 22.1 | HD | Basil  | 2 |
| H(+105.04)GVFLWSWFH(+105.04)WFDNCA<br>GLSADEPTFAK | P08221 CB21<br>_CUCSA  | Chlorophyll binding protein,<br>chloroplastic              | 3377.5 | 22.0 | HD | Basil  | 1 |
| Y(+120.03)GCDYLGPNPSLVVPAR                        | Q10HD0 CB2<br>3_ORYSJ  | Chlorophyll binding protein,<br>chloroplastic              | 1842.9 | 20.4 | GB | Basil  | 1 |
| RY(+33.96)VVD DAGVLSR                             | P29357 HSP7<br>E_SPIOL | Chloroplast envelope<br>membrane                           | 1382.7 | 17.4 | Cl | Nettle | 1 |
| KLLRY(+120.03)LPGESDSDFSDFSSK                     | Q9SA52 CP41<br>B_ARATH | Chloroplast stem-loop<br>binding protein,<br>chloroplastic | 2410.1 | 19.2 | GB | Laurel | 1 |
| KQPLAQKLY(+120.03)SDSDFSDFSK                      | Q9SA52 CP41<br>B_ARATH | Chloroplast stem-loop<br>binding protein,<br>chloroplastic | 2410.1 | 19.5 | GB | Basil  | 1 |
| RY(+120.03)LLKLPGESDSDFSDFSSK                     | Q9SA52 CP41<br>B_ARATH | Chloroplast stem-loop<br>binding protein,<br>chloroplastic | 2410.1 | 19.5 | GB | Basil  | 1 |
| Y(+120.03)Y(+120.03)LLDVVYDLNGR                   | Q9SA52 CP41<br>B_ARATH | Chloroplast stem-loop<br>binding protein,<br>chloroplastic | 1841.9 | 21.8 | GB | Basil  | 1 |
| VAVEAQWVADY(+120.03)AVK                           | Q0WLB5 CLA<br>H2_ARATH | Clathrin                                                   | 1667.8 | 17.8 | GB | Basil  | 1 |
| TPLTDAAAAY(+120.03)YRR                            | P25076 CY11<br>_SOLTU  | Cytochrome                                                 | 1587.8 | 19.7 | GB | Laurel | 1 |
| H(+105.04)HLTFPLSPDPTTK                           | A6MMV7 CYF<br>_ILLOL   | Cytochrome                                                 | 1807.9 | 21.8 | HD | Basil  | 2 |
| QFY(+120.03)SVTVESAEATLK                          | Q9SRZ6 ICDH<br>C_ARATH | Cytosolic isocitrate<br>dehydrogenase [NADP]               | 1791.9 | 18.5 | GB | Laurel | 1 |
| GFVY(+120.03)DLLLLPR                              | F4JLP5 PLPD2<br>_ARATH | Dihydropyridyl<br>dehydrogenase,<br>chloroplastic          | 1424.8 | 22.8 | GB | Basil  | 1 |
| KYH(+105.04)VAEMNKR                               | P34824 EF1A<br>1_HORVU | Elongation factor                                          | 1379.7 | 15.3 | HD | Laurel | 1 |



|                                  |                     |                                                           |        |      |    |        |   |
|----------------------------------|---------------------|-----------------------------------------------------------|--------|------|----|--------|---|
| LPLQDVY(+33.96)K                 | Q03033 EF1A_WHEAT   | Elongation factor                                         | 1008.5 | 19.7 | Cl | Nettle | 1 |
| DY(+120.03)LPGHKKLTLR            | O24310 EFTU_PEA     | Elongation factor, chloroplastic                          | 1660.9 | 19.8 | GB | Basil  | 1 |
| KWSY(+120.03)LFAVEDVFSLTGR       | Q43467 EFTU_1_SOYBN | Elongation factor, chloroplastic                          | 2137.1 | 23.4 | GB | Basil  | 1 |
| H(+105.04)LEAPSRLLAAQPK          | Q6ZA06 GUN_20_ORYSJ | Endoglucanase                                             | 1634.9 | 20.1 | HD | Laurel | 1 |
| ATLPAFY(+67.92)LKKLPLPLR         | Q42971 ENO_ORYSJ    | Enolase                                                   | 1908.1 | 21.7 | Cl | Nettle | 1 |
| KNEVHKY(+120.03)RDDTLLADEELAK    | P56337 IF5A5_SOLTU  | Eukaryotic translation initiation factor                  | 2506.2 | 20.3 | GB | Basil  | 1 |
| WPY(+120.03)Y(+120.03)LFDLFDDWLR | P23225 GLTB_MAIZE   | Ferredoxin-dependent glutamate synthase, chloroplastic    | 2188.0 | 22.3 | GB | Basil  | 1 |
| NGY(+120.03)LSFLANLVLSDR         | Q43155 GLTB_SPIOL   | Ferredoxin-dependent glutamate synthase, chloroplastic    | 1800.9 | 21.0 | GB | Basil  | 1 |
| Y(+120.03)VMAAEKPAADAPAAEPK      | Q69RJO GLTB_ORYSJ   | Ferredoxin-dependent glutamate synthase, chloroplastic    | 2020.0 | 17.7 | GB | Basil  | 1 |
| VVPLLEAY(+67.92)VPK              | Q69RJO GLTB_ORYSJ   | Ferredoxin-dependent glutamate synthase, chloroplastic    | 1294.6 | 20.5 | Cl | Nettle | 1 |
| H(+105.04)DLLQLSGHDGGTGASPVSSLK  | Q43155 GLTB_SPIOL   | Ferredoxin-dependent glutamate synthase, chloroplastic    | 2280.1 | 18.7 | HD | Basil  | 1 |
| TY(+120.03)SNTGVKGA VNVQWDKK     | P25851 F16P_1_ARATH | Fructose-1,6-bisphosphatase, chloroplastic                | 2114.1 | 19.1 | GB | Laurel | 1 |
| H(+105.04)DELVLVFEHR             | P46256 ALF1_PEA     | Fructose-bisphosphate aldolase, cytoplasmic               | 1497.8 | 21.5 | HD | Laurel | 1 |
| WKYWY(+120.03)VLKENNVLPGLK       | P46256 ALF1_PEA     | Fructose-bisphosphate aldolase, cytoplasmic               | 2269.2 | 21.3 | GB | Basil  | 1 |
| QECKH(+105.04)TDVLQENNVLPGLK     | O65581 ALFC_5_ARATH | Fructose-bisphosphate aldolase, cytosolic                 | 2269.1 | 20.9 | HD | Basil  | 1 |
| RPLTY(+33.96)GLLLASLGLEWDNGGR    | P16096 ALFC_SPIOL   | Fructose-bisphosphate aldolase, cytosolic                 | 2334.2 | 18.4 | Cl | Nettle | 1 |
| Y(+120.03)Y(+120.03)LVFEVLQK     | Q9XQ94 GLN_A2_MEDSA | Glutamine synthetase leaf isozyme, chloroplastic          | 1540.8 | 15.8 | GB | Basil  | 1 |
| H(+105.04)KLLNLDVTPYTDK          | O22506 GLN_A2_DAUCA | Glutamine synthetase, chloroplastic                       | 1760.9 | 21.3 | HD | Basil  | 1 |
| HPY(+120.03)LSAYGEDGKR           | O22506 GLN_A2_DAUCA | Glutamine synthetase, chloroplastic                       | 1611.7 | 15.1 | GB | Basil  | 1 |
| QMY(+120.03)HVFEVLQK             | O22506 GLN_A2_DAUCA | Glutamine synthetase, chloroplastic                       | 1540.8 | 15.9 | GB | Basil  | 1 |
| RY(+120.03)WTPKGE GNER           | O22506 GLN_A2_DAUCA | Glutamine synthetase, chloroplastic                       | 1611.8 | 15.1 | GB | Laurel | 1 |
| KHKY(+67.92)WDELFGGYLYFHK        | O24338 ASNS_SANAU   | Glutamine-dependent asparagine synthetase                 | 2298.0 | 21.0 | Cl | Nettle | 1 |
| Y(+120.03)LVRHYPLDVVDFMR         | P09044 G3PB_TOBAC   | Glyceraldehyde-3-phosphate dehydrogenase B, chloroplastic | 2141.1 | 22.9 | GB | Basil  | 1 |
| HSMLGTFY(+120.03)ER              | P09044 G3PB_TOBAC   | Glyceraldehyde-3-phosphate, chloroplastic                 | 1359.6 | 15.8 | GB | Basil  | 1 |
| LTLFGDKPVAVY(+33.96)GPR          | P08735 G3PC_1_MAIZE | Glyceraldehyde-3-phosphate, cytosolic                     | 1665.9 | 22.1 | Cl | Nettle | 1 |
| KGADVCH(+105.04)VVEAVR           | O49954 GCSP_SOLTU   | Glycine decarboxylase                                     | 1486.8 | 16.2 | HD | Basil  | 1 |
| WQQA AEKY(+120.03)RQPAAAEATAPVPK | P26969 GCSP_PEA     | Glycine dehydrogenase, mitochondrial                      | 2530.3 | 17.3 | GB | Basil  | 1 |

|                                                     |                          |                                                              |        |      |    |        |   |
|-----------------------------------------------------|--------------------------|--------------------------------------------------------------|--------|------|----|--------|---|
| Y(+33.96)AASDLRKAK                                  | Q01899 M_HSP7<br>M_PHAVU | Heat shock protein,<br>mitochondrial                         | 1155.6 | 17.3 | Cl | Nettle | 1 |
| MSY(+120.03)AFFADYTEAHLK                            | Q9FE01 APX2<br>_ORYSJ    | L-ascorbate peroxidase,<br>cytosolic                         | 1912.8 | 20.6 | GB | Basil  | 1 |
| LAEEAAEKRY(+120.03)KPAAEDGVPAPK                     | P30184 AMPL<br>1_ARATH   | Leucine aminopeptidase                                       | 2530.3 | 17.1 | GB | Laurel | 1 |
| GY(+120.03)KLEGDGGPGTLK                             | O24248 PRU1<br>_PRUAV    | Major allergen Pru av 1                                      | 1638.8 | 15.7 | GB | Laurel | 1 |
| H(+105.04)PELEGDGGPGTLK                             | O24248 PRU1<br>_PRUAV    | Major allergen Pru av 2                                      | 1510.7 | 16.4 | HD | Basil  | 1 |
| KRQQY(+120.03)VCTSELPPPR                            | O24248 PRU1<br>_PRUAV    | Major allergen Pru av 3                                      | 1921.0 | 21.2 | GB | Laurel | 1 |
| LYY(+120.03)Y(+120.03)VLRFESLKPSDTDLG<br>SK         | O49079 PSBO<br>_FRIAG    | Oxygen-evolving enhancer,<br>chloroplastic                   | 2733.3 | 21.0 | GB | Basil  | 1 |
| LSEELGKGH(+105.04)AK                                | P14226 PSBO<br>_PEA      | Oxygen-evolving enhancer,<br>chloroplastic                   | 1401.7 | 15.5 | HD | Basil  | 1 |
| H(+105.04)EGPLEVSVLKDR                              | P85194 PSBO<br>_HELAN    | Oxygen-evolving enhancer,<br>chloroplastic                   | 1582.8 | 20.0 | HD | Laurel | 1 |
| SEQWNVEVY                                           | Q40459 PSBO<br>_TOBAC    | Oxygen-evolving enhancer,<br>chloroplastic                   | 1595.7 | 18.9 | Cl | Nettle | 1 |
| H(+105.04)GENWLEYPGQVLR                             | P16059 PSBP<br>_PEA      | Oxygen-evolving enhancer,<br>chloroplastic                   | 1801.9 | 20.8 | HD | Basil  | 1 |
| Y(+120.03)MQWLEYPGQVLR                              | P16059 PSBP<br>_PEA      | Oxygen-evolving enhancer,<br>chloroplastic                   | 1801.9 | 21.1 | GB | Basil  | 1 |
| Y(+120.03)WWWWEYPGKVLR                              | P85189 PSBP<br>_HELAN    | Oxygen-evolving enhancer,<br>chloroplastic                   | 1801.9 | 21.0 | GB | Laurel | 1 |
| DGDATEH(+105.04)HKLLSATVNDGK                        | Q04127 PSBP<br>3_TOBAC   | Oxygen-evolving enhancer,<br>chloroplastic                   | 2112.0 | 16.4 | HD | Basil  | 1 |
| EAVH(+105.04)AH(+105.04)APSDELEYPGQV<br>LR          | Q04127 PSBP<br>3_TOBAC   | Oxygen-evolving enhancer,<br>chloroplastic                   | 2427.2 | 20.3 | HD | Basil  | 1 |
| SY(+120.03)NDELEYPGKVLR                             | Q04127 PSBP<br>3_TOBAC   | Oxygen-evolving enhancer,<br>chloroplastic                   | 1801.9 | 21.2 | GB | Basil  | 1 |
| Y(+120.03)CVTPNVVVAADNAAPPR                         | P83218 PME_<br>DAUCA     | Pectinesterase                                               | 1976.0 | 20.1 | GB | Laurel | 1 |
| Y(+120.03)TWASLAAEAKK                               | O49006 PME<br>3_ARATH    | Pectinesterase                                               | 1457.7 | 18.8 | GB | Laurel | 1 |
| HVVFQGVVEPY(+33.96)GLPK                             | Q39613 CYPH<br>_CATRO    | Peptidyl-prolyl cis-trans<br>isomerase                       | 1701.9 | 19.1 | Cl | Nettle | 1 |
| QLVNY(+120.03)VGTEAVAK                              | P50318 PGKH<br>2_ARATH   | Phosphoglycerate kinase,<br>chloroplastic                    | 1510.8 | 18.4 | GB | Laurel | 1 |
| REVLLPTTLVVADKFAY(+120.03)NSK                       | P41758 PGKH<br>_CHLRE    | Phosphoglycerate kinase,<br>chloroplastic                    | 2383.3 | 22.0 | GB | Basil  | 1 |
| HY(+120.03)VFAVGTEAVAK                              | Q42961 PGK<br>H_TOBAC    | Phosphoglycerate kinase,<br>chloroplastic                    | 1510.8 | 18.7 | GB | Basil  | 1 |
| H(+105.04)ELAGFQYLGGPETGEK                          | P0DKC3 PGP1<br>A_ARATH   | Phosphoglycolate<br>phosphatase, chloroplastic               | 1936.9 | 22.0 | HD | Laurel | 1 |
| H(+105.04)MQEPLVVGALK                               | P0DKC3 PGP1<br>A_ARATH   | Phosphoglycolate<br>phosphatase, chloroplastic               | 1425.8 | 17.4 | HD | Laurel | 1 |
| KFY(+120.03)Y(+120.03)DGTGLFQTLVGLK                 | P26302 KPPR<br>_WHEAT    | Phosphoribulokinase,<br>chloroplastic                        | 2189.1 | 22.3 | GB | Basil  | 1 |
| WLYGY(+33.96)CPYYHVSVLEFDGQFDR                      | P26302 KPPR<br>_WHEAT    | Phosphoribulokinase,<br>chloroplastic                        | 2790.2 | 22.0 | Cl | Nettle | 1 |
| WH(+105.04)EPAYPGGPLFNPLGFGK                        | Q9SY97 LHCA<br>3_ARATH   | Photosystem chlorophyll<br>binding protein,<br>chloroplastic | 2188.1 | 22.2 | HD | Basil  | 1 |
| KHY(+120.03)WALAPELLGK                              | Q9SY97 LHCA<br>3_ARATH   | Photosystem chlorophyll<br>binding protein,<br>chloroplastic | 1644.9 | 21.7 | GB | Basil  | 1 |
| KTY(+120.03)HPLVYDTWESPK                            | P12372 PSAD<br>_SOLLC    | Photosystem I reaction<br>center, chloroplastic              | 1983.0 | 20.3 | GB | Laurel | 1 |
| RRNNVTEALH(+105.04)TYH(+105.04)YFYW<br>PLFGGSTGGLLR | P36213 PSAD<br>_HORVU    | Photosystem I reaction<br>center, chloroplastic              | 3634.8 | 22.3 | HD | Basil  | 1 |

|                                                       |                    |                                                       |        |      |    |        |   |
|-------------------------------------------------------|--------------------|-------------------------------------------------------|--------|------|----|--------|---|
| Y(+120.03)AHPADGLPHLLVSTAQR                           | P13192 PSAF_HORVU  | Photosystem I reaction center, chloroplastic          | 2065.1 | 21.4 | GB | Basil  | 1 |
| AAEEAAEKY(+120.03)RKPAAAEATPVAPK                      | P12354 PSAE_SPIOL  | Photosystem I reaction center, chloroplastic          | 2488.3 | 16.1 | GB | Laurel | 1 |
| WSFAAEH(+105.04)HPENLLFPPEVLPR                        | Q2MIA5 PSB_D_SOLL  | Photosystem II D2                                     | 2622.3 | 20.5 | HD | Basil  | 2 |
| AAEDPEFETFY(+33.96)TK                                 | Q3MA59 PSB_D_TRIV2 | Photosystem II D2                                     | 3877.4 | 20.7 | Cl | Nettle | 1 |
| WKY(+120.03)VY(+120.03)Y(+120.03)PKSV GRATELNAVNYVSPR | P0C367 PSBC_ORYSJ  | Photosystem II reaction center                        | 3319.6 | 21.1 | GB | Basil  | 1 |
| Y(+120.03)AEDGTLALAGR                                 | Q09G50 PSBC_PLAOC  | Photosystem II reaction center                        | 1355.6 | 23.6 | GB | Laurel | 1 |
| QRDLWHAPY(+67.92)KVLVGGVATELNAVNY VSPR                | Q09G50 PSBC_PLAOC  | Photosystem II reaction center                        | 3319.6 | 21.0 | Cl | Nettle | 1 |
| QSFDH(+105.04)TLAVGWLGHPLFR                           | P56777 PSBB_ARATH  | Photosystem II reaction center                        | 2185.1 | 21.1 | HD | Basil  | 1 |
| LMVVY(+33.96)ERTFPVVLVDGDGLVR                         | Q06FP2 PSBB_PELHO  | Photosystem II reaction center                        | 2410.2 | 22.5 | Cl | Nettle | 1 |
| VPVY(+33.96)FETFPVVLVDGDGLVR                          | Q06FP2 PSBB_PELHO  | Photosystem II reaction center                        | 2254.1 | 22.7 | Cl | Nettle | 1 |
| FVDPSDPLLDYF(+120.03)R                                | Q70XY1 PSBB_AMBTC  | Photosystem II reaction center                        | 1702.8 | 22.1 | GB | Basil  | 1 |
| GY(+120.03)HLGDGNAVGLGHPLFR                           | P56777 PSBB_ARATH  | Photosystem II reaction center                        | 2185.1 | 21.5 | GB | Basil  | 1 |
| VFDPSDPLLDYF(+120.03)R                                | P56777 PSBB_ARATH  | Photosystem II reaction center                        | 1702.8 | 22.1 | GB | Basil  | 1 |
| RY(+120.03)FGKVEDEDFEFAGVDVSK                         | P11970 PLAS2_POPNI | Plastocyanin B, chloroplastic                         | 2555.2 | 20.1 | GB | Laurel | 1 |
| ERP(+33.96)EFMLNAPGEVYSVTLSEK                         | P00288 PLAS_VICFA  | Plastocyanin                                          | 2592.2 | 21.4 | Cl | Nettle | 1 |
| GPEVY(+33.96)PMYLNAPGEVYSVTLSEK                       | P00288 PLAS_VICFA  | Plastocyanin                                          | 2576.2 | 21.3 | Cl | Nettle | 1 |
| KVY(+120.03)VS(+120.03)VVFDEDEVPARD VAK               | P07030 PLAS_SILLB  | Plastocyanin, chloroplastic                           | 2667.3 | 19.3 | GB | Laurel | 1 |
| Y(+120.03)CMTQDQEGVPEMTPVK                            | Q9FHQ6 UBQ9_ARATH  | Polyubiquitin                                         | 2173.9 | 20.4 | GB | Laurel | 1 |
| LEGAYDRY(+33.96)FQLEAASQQFNGYELDGR                    | Q9JLJ3 PREP1_ARATH | Presequence protease 1, chloroplastic/mitochondrial   | 3073.4 | 22.2 | Cl | Nettle | 1 |
| VVAEAAKAQFSNKAY(+120.03)YDK                           | Q2JRU4 AMPA_SYNJA  | Probable cytosol aminopeptidase                       | 2122.0 | 17.4 | GB | Laurel | 1 |
| Y(+120.03)RKMVMGLDKSLEAEFLDR                          | P83344 XYNB_PRUPE  | Putative beta-D-xylosidase                            | 2420.2 | 22.8 | GB | Laurel | 1 |
| Y(+120.03)TLPGHKKAFLPR                                | P83344 XYNB_PRUPE  | Putative beta-D-xylosidase                            | 1646.9 | 18.6 | GB | Laurel | 2 |
| Y(+120.03)HNHY(+120.03)LLVGQLEWR                      | P31414 AVP1_ARATH  | Pyrophosphate-energized vacuolar membrane proton pump | 2067.0 | 16.5 | GB | Basil  | 1 |
| MCVVY(+120.03)DLTDPFGLLTDHK                           | Q40521 RB11B_TOBAC | Ras-related protein Rab11B                            | 2299.1 | 21.9 | GB | Basil  | 1 |
| RRKRY(+120.03)YVELSEVLYNR                             | P28644 ROC1_SPIOL  | ribonucleoprotein, chloroplastic                      | 2263.2 | 22.6 | GB | Basil  | 1 |
| RY(+120.03)KDEAAPAKRPAEAPK                            | Q4FP12 RS16_PELUB  | ribosomal protein                                     | 2017.1 | 15.8 | GB | Basil  | 1 |
| RKY(+120.03)ADAPAEAPK                                 | O22518 RSSA_SOYBN  | ribosomal protein                                     | 1435.7 | 15.7 | GB | Basil  | 1 |
| TPKFLEGGSVY(+120.03)ELVEK                             | Q4FG71 RR3_RANMC   | ribosomal protein, chloroplastic                      | 1915.0 | 19.6 | GB | Laurel | 1 |
| AEERDKY(+120.03)RKPAAAEAPAEAPK                        | P24929 RK12_TOBAC  | ribosomal protein, chloroplastic                      | 2417.2 | 16.1 | GB | Basil  | 1 |
| VAY(+33.96)PIDLFEESVTNLFTSIVGNVFGFK                   | P48711 RBL_PICAB   | RuBisCO                                               | 3096.5 | 23.0 | Cl | Nettle | 2 |

|                                                     |                       |                  |        |      |    |        |   |
|-----------------------------------------------------|-----------------------|------------------|--------|------|----|--------|---|
| GHYLNATAATC(+67.92)EEMLKR                           | Q1KVV0 RBL_<br>TETOB  | RuBisCO          | 1974.8 | 16.2 | Cl | Nettle | 2 |
| DY(+120.03)MEVHSGTVVGK                              | P19163 RBL_<br>NEUMU  | RuBisCO          | 1540.7 | 15.1 | GB | Basil  | 1 |
| EY(+120.03)FDPSGTVVGK                               | P19163 RBL_<br>NEUMU  | RuBisCO          | 1417.7 | 15.6 | GB | Basil  | 1 |
| MVENY(+120.03)KY(+120.03)Y(+120.03)DD<br>ENVNSKPFMR | P19163 RBL_<br>NEUMU  | RuBisCO          | 2901.2 | 19.0 | GB | Basil  | 1 |
| MWY(+120.03)VHSGTVVGQLEWR                           | P19163 RBL_<br>NEUMU  | RuBisCO          | 2067.0 | 16.5 | GB | Basil  | 1 |
| TY(+120.03)WTKDDENVNSQPETR                          | P19163 RBL_<br>NEUMU  | RuBisCO          | 2202.0 | 20.3 | GB | Basil  | 1 |
| WY(+120.03)MVHSGTVVGQLEWR                           | P19163 RBL_<br>NEUMU  | RuBisCO          | 2067.0 | 16.5 | GB | Basil  | 2 |
| WY(+120.03)PDHSGTVVGKLEWR                           | P19163 RBL_<br>NEUMU  | RuBisCO          | 2049.0 | 16.5 | GB | Basil  | 1 |
| NNAAQSH(+105.04)KWDLAAEGANLLR                       | P28420 RBL_<br>UNCGR  | RuBisCO          | 2283.1 | 19.2 | HD | Basil  | 1 |
| LTYYPTEY(+33.96)NPKDTDILAAFR                        | P28438 RBL_<br>PASQU  | RuBisCO          | 2424.1 | 22.5 | Cl | Nettle | 1 |
| LTYYPTEY(+33.96)ETK                                 | P48706 RBL_<br>LACSA  | RuBisCO          | 1440.6 | 19.4 | Cl | Nettle | 2 |
| MAVWTKH(+105.04)WYRSDVWTDGLTSLDR                    | Q33438 RBL_<br>ERYCG  | RuBisCO          | 2927.4 | 20.6 | HD | Basil  | 1 |
| AVYY(+120.03)FLTAGREDDKTFDANSQPFMR                  | P19163 RBL_<br>NEUMU  | RuBisCO          | 3061.4 | 20.5 | GB | Laurel | 1 |
| WY(+120.03)Y(+120.03)SGVNVVNSQPFMR                  | P19163 RBL_<br>NEUMU  | RuBisCO          | 2186.0 | 20.9 | GB | Laurel | 1 |
| DEDNVNSQPFY(+33.96)DPK                              | P19163 RBL_<br>NEUMU  | RuBisCO          | 1700.7 | 18.9 | Cl | Nettle | 1 |
| EAAATDAEALY(+33.96)K                                | P19163 RBL_<br>NEUMU  | RuBisCO          | 1285.6 | 22.7 | Cl | Nettle | 1 |
| EEENVNSKPY(+33.96)PR                                | P19163 RBL_<br>NEUMU  | RuBisCO          | 1494.7 | 18.6 | Cl | Nettle | 1 |
| Y(+67.92)TSASGLHAGTVVGK                             | P19163 RBL_<br>NEUMU  | RuBisCO          | 1514.7 | 15.7 | Cl | Nettle | 1 |
| RY(+120.03)MDTDLLAAFR                               | P48708 RBL_<br>MOROL  | RuBisCO          | 1590.8 | 21.7 | GB | Laurel | 1 |
| WY(+120.03)DHTAGAVEEMLKR                            | Q32303 RBL_<br>GALLU  | RuBisCO          | 1924.9 | 17.8 | GB | Basil  | 1 |
| Y(+120.03)HLLEQDR                                   | Q33438 RBL_<br>ERYCG  | RuBisCO          | 1192.6 | 17.0 | GB | Basil  | 1 |
| GY(+120.03)LADAASKEDLKAR                            | P21239 RUB1<br>_BRANA | RuBisCO          | 1889.9 | 18.6 | GB | Laurel | 1 |
| KKDCY(+120.03)RLLEELEQK                             | P34794 RUB2<br>_BRANA | RuBisCO          | 1914.0 | 21.5 | GB | Basil  | 1 |
| KVY(+33.96)LSFLAYKFKDYR                             | P19310 RBS4<br>_LEMGI | RuBisCO          | 1974.0 | 19.9 | Cl | Nettle | 1 |
| H(+105.04)ELSEESLKEGK                               | Q08185 RBS5<br>_MESCR | RuBisCO          | 1489.7 | 16.4 | HD | Laurel | 1 |
| WRWY(+120.03)DVSDDKKDLAR                            | O98997 RCA_<br>VIGRR  | RuBisCO activase | 2072.0 | 19.9 | GB | Laurel | 1 |
| H(+105.04)WDYMLVQEQENVK                             | Q01587 RCA_<br>CUCSA  | RuBisCO activase | 1922.9 | 21.4 | HD | Basil  | 1 |
| Y(+120.03)NDEDKKTVDAATPK                            | Q40281 RCA_<br>MALDO  | RuBisCO activase | 1813.8 | 17.7 | GB | Laurel | 1 |
| LY(+33.96)SEAAALGDANQDLAK                           | Q40281 RCA_<br>MALDO  | RuBisCO activase | 1711.8 | 19.5 | Cl | Nettle | 1 |
| CY(+120.03)PEDPTAEGFYLAFFDK                         | Q7X9A0 RCA<br>1_LARTR | RuBisCO activase | 2400.0 | 21.9 | GB | Basil  | 1 |
| RY(+120.03)Y(+120.03)FLVQEQERGRK                    | Q7X9A0 RCA<br>1_LARTR | RuBisCO activase | 2111.0 | 19.3 | GB | Basil  | 1 |

|                                    |                    |                                                |        |      |    |        |   |
|------------------------------------|--------------------|------------------------------------------------|--------|------|----|--------|---|
| Y(+120.03)AQVGKCLVQEQENVK          | Q7X9A0 RCA1_LARTR  | RuBisCO activase                               | 1955.0 | 20.0 | GB | Basil  | 1 |
| Y(+120.03)TNTDRWNLLLEDVSDQKDLAR    | Q7X9A0 RCA1_LARTR  | RuBisCO activase                               | 2786.3 | 20.9 | GB | Basil  | 1 |
| H(+105.04)GNLEDVSDDKQDLAR          | Q7X999 RCA2_LARTR  | RuBisCO activase                               | 1915.9 | 20.9 | HD | Laurel | 1 |
| KLVAAY(+33.96)DLNENANGLAR          | A9P822 METK1_POPTR | S-adenosylmethionine                           | 2093.1 | 19.3 | Cl | Nettle | 1 |
| TADY(+67.92)RRHKLLSATVK            | P09439 LOX2_SOYBN  | Seed linoleate 9S-lipoxygenase-2               | 1825.9 | 16.4 | Cl | Nettle | 1 |
| SSAKVAEY(+120.03)VKAK              | Q94C74 GLYM2_ARATH | Serine hydroxymethyltransferase, mitochondrial | 1399.7 | 16.0 | GB | Basil  | 1 |
| LDESTGYIDY(+33.96)DQLEK            | P50433 GLYM_SOLTU  | Serine hydroxymethyltransferase, mitochondrial | 1821.8 | 18.7 | Cl | Nettle | 1 |
| CPEAAEKY(+120.03)RKPAAAEATVPAPK    | Q940H6 SRK2E_ARATH | Serine/threonine-protein kinase                | 2417.2 | 16.1 | GB | Basil  | 1 |
| RDEAAEKY(+120.03)RQPAAAEATVPAPK    | Q940H6 SRK2E_ARATH | Serine/threonine-protein kinase                | 2488.2 | 16.2 | GB | Basil  | 1 |
| Y(+33.96)NLSLGLGLNK                | P84187 SGAT_MAIZE  | Serine-glyoxylate aminotransferase             | 1224.6 | 18.9 | Cl | Nettle | 2 |
| H(+105.04)DVYMWVATANLLEESTPTVDGK   | Q9THX6 TL29_SOLLC  | Thylakoid lumenal, chloroplastic               | 2779.3 | 22.2 | HD | Basil  | 1 |
| KNQY(+120.03)LEAEWNAK              | O20250 TKTC_SPIOL  | Transketolase, chloroplastic                   | 1612.8 | 17.8 | GB | Laurel | 2 |
| YPRY(+120.03)NWTAGSYK              | O20250 TKTC_SPIOL  | Transketolase, chloroplastic                   | 1624.7 | 16.0 | GB | Basil  | 1 |
| KHLNYMAAKSHNY(+33.96)LLLGTGSELEAAK | Q8RWV0 TKTC1_ARATH | Transketolase, chloroplastic                   | 3005.5 | 20.9 | Cl | Nettle | 1 |
| SPEEAAEKY(+120.03)RKPAAAEATVPPK    | F4IW47 TKTC2_ARATH | Transketolase, chloroplastic                   | 2530.3 | 17.2 | GB | Basil  | 1 |
| RY(+120.03)KAKEVHSLCGGK            | Q9M4S8 TPIC_FRAAN  | Triosephosphate isomerase, chloroplastic       | 1694.9 | 18.9 | GB | Basil  | 1 |

<sup>a</sup> Peptides detected in given number of repetitions (N)
